# Supplementary material for: Syntheses, structures and magnetic properties of a family of metal carboxylate polymers viain situ metal–ligand reactions of benzene-1,2,3-tricarboxylic acid
Source: Royal Society of Chemistry journal article supplement (doi:10.1039/b815843f), 2009-01-01
Supplement: b815843f.pdf [file b815843f.pdf]

Supporting Information for

## Syntheses, Structures and Magnetic Properties of A Family of Metal Carboxylate Polymers *via* In-Situ Metal/Ligand Reactions of Benzene-1,2,3-tricarboxylic Acid

Yan-Zhen Zheng, Yue-Biao Zhang, Ming-Liang Tong\*, Wei Xue and Xiao-Ming Chen\*

MOE Key Laboratory of Bioinorganic and Synthetic Chemistry, School of Chemistry and Chemical Engineering, Sun Yat-Sen University, Guangzhou 510275, China.

Fax: +86-20-84112245; Tel: +86-20-84112074

e-mail: [cxm@mail.sysu.edu.cn](mailto:cxm@mail.sysu.edu.cn) (CXM); [tongml@mail.sysu.edu.cn](mailto:tongml@mail.sysu.edu.cn) (TML)

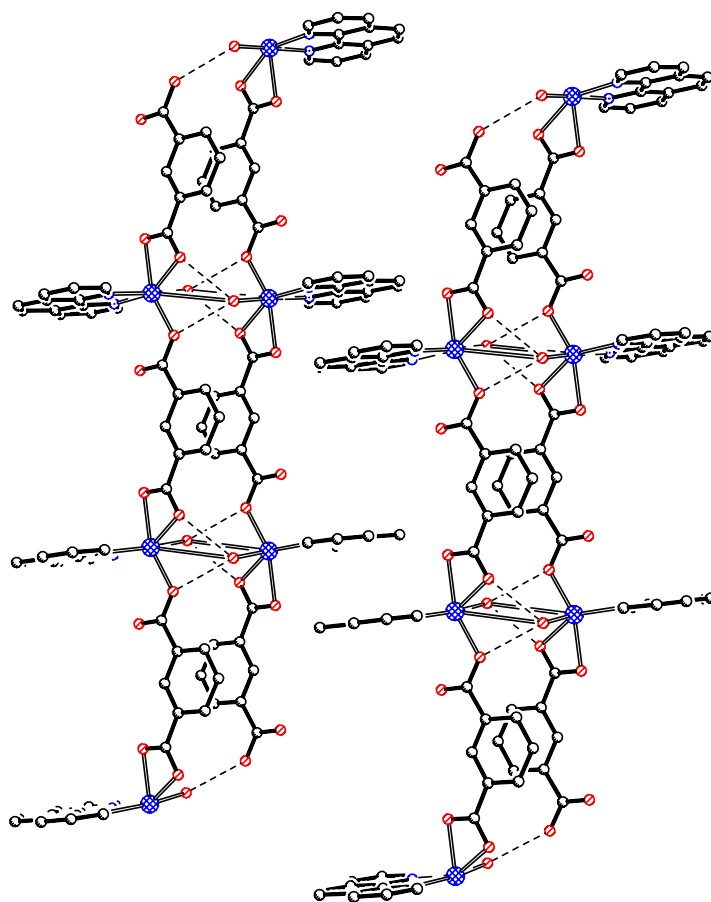

Fig. S1 Perspective view of crystal packing diagram of **9**.

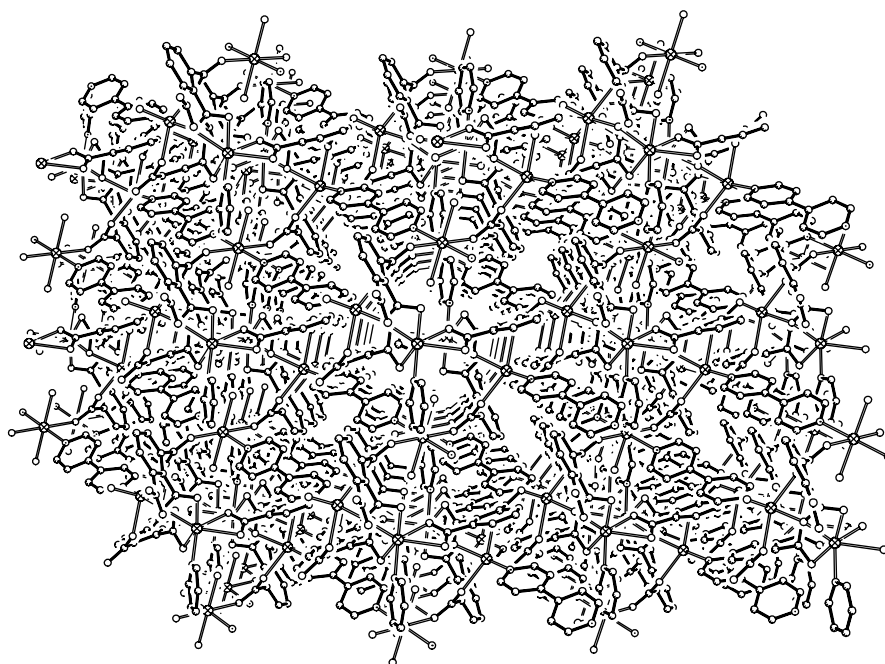

**Fig. S2** Perspective view of crystal packing diagram of **12**.

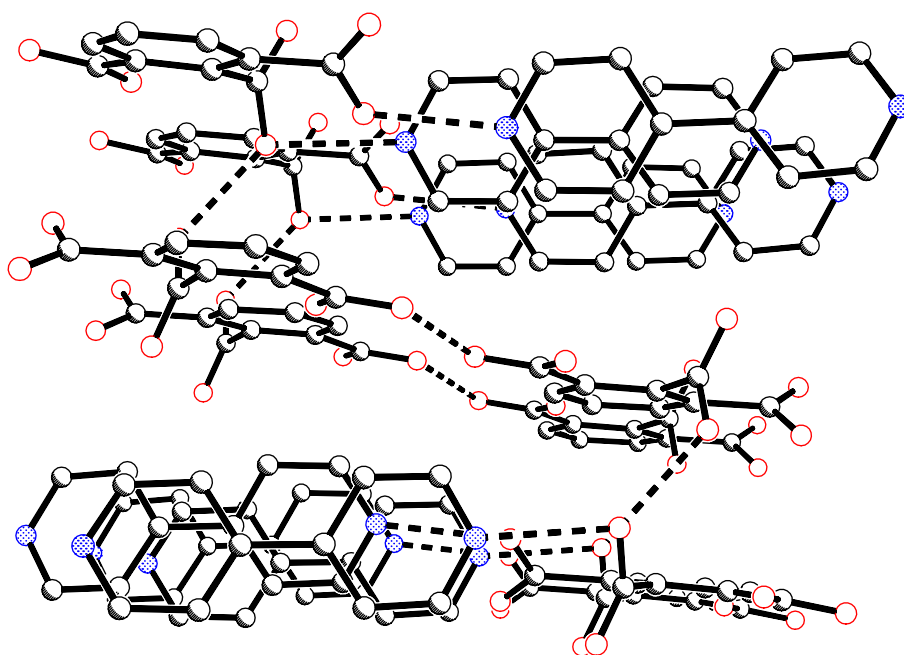

**Fig. S3** Perspective view of crystal packing diagram of **13**.
